# Supplementary material for: VSV-G pseudotyping rescues HIV-1 CA mutations that impair core assembly or stability
Source: PubMed Central journal article supplement (PMC2474847; doi:10.1186/1742-4690-5-57), 2008-07-07
Supplement: 1742-4690-5-57-S2.pdf [file 1742-4690-5-57-S2.pdf]

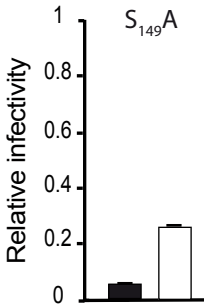

■ HIV Env

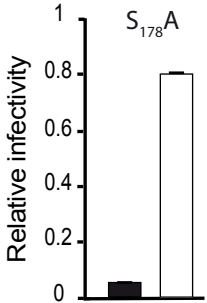

□ VSV-G
